# Supplementary material for: Alcohol consumption and cancer incidence in women: interaction with smoking, body mass index and menopausal hormone therapy
Source: Springer Nature journal article supplement (doi:10.1186/s12885-023-11184-8), 2023-08-16
Supplement: MOESM1 [file 25928642]

**eTable 1: Relative risks by cancer site for alcohol intake categories in drinks/week and per 1 drink/day of alcohol**

| Cancer site                                            | Alcohol consumption (drinks per week) |       |      |           |      |       |           |      |      |           |      |      |           |      | RR* 95%CI<br>per 1 drink/day<br>of alcohol | p (trend) |      |                  |        |
|--------------------------------------------------------|---------------------------------------|-------|------|-----------|------|-------|-----------|------|------|-----------|------|------|-----------|------|--------------------------------------------|-----------|------|------------------|--------|
|                                                        | 1-2                                   |       |      |           | 3-6  |       |           |      | 7-14 |           |      |      | 15+       |      |                                            |           |      |                  |        |
|                                                        | N                                     | n     | RR*  | 95% g-sCI | n    | RR*   | 95% g-sCI | n    | RR*  | 95% g-sCI | n    | RR*  | 95% g-sCI |      |                                            |           |      |                  |        |
| Oesophageal squamous cell carcinoma (C15) <sup>†</sup> | 1108                                  | 317   | 1.00 | 0.89      | 1.12 | 255   | 1.10      | 0.97 | 1.25 | 372       | 1.38 | 1.24 | 1.53      | 164  | 2.13                                       | 1.82      | 2.50 | 1.44 (1.31-1.57) | <0.001 |
| Oral cavity & pharynx (C00-C14)                        | 1952                                  | 577   | 1.00 | 0.92      | 1.09 | 456   | 1.07      | 0.98 | 1.17 | 623       | 1.23 | 1.14 | 1.33      | 296  | 1.95                                       | 1.74      | 2.20 | 1.36 (1.27-1.46) | <0.001 |
| Larynx (C32)                                           | 297                                   | 69    | 1.00 | 0.79      | 1.27 | 72    | 1.29      | 1.02 | 1.63 | 116       | 1.64 | 1.36 | 1.96      | 40   | 1.78                                       | 1.30      | 2.46 | 1.35 (1.13-1.61) | 0.001  |
| Breast (C50) <sup>††</sup>                             | 46022                                 | 16013 | 1.00 | 0.98      | 1.02 | 11893 | 1.05      | 1.03 | 1.07 | 13920     | 1.12 | 1.11 | 1.14      | 4196 | 1.26                                       | 1.22      | 1.30 | 1.12 (1.10-1.14) | <0.001 |
| Colorectum (C18-C20)                                   | 16548                                 | 5965  | 1.00 | 0.97      | 1.03 | 4270  | 1.03      | 1.00 | 1.06 | 4835      | 1.08 | 1.05 | 1.11      | 1478 | 1.25                                       | 1.18      | 1.31 | 1.10 (1.07-1.13) | <0.001 |
| Liver (C22)                                            | 1241                                  | 457   | 1.00 | 0.91      | 1.10 | 321   | 1.03      | 0.92 | 1.15 | 356       | 1.06 | 0.96 | 1.18      | 107  | 1.21                                       | 1.00      | 1.47 | 1.09 (0.99-1.19) | 0.083  |
| Pancreas (C25)                                         | 4020                                  | 1466  | 1.00 | 0.95      | 1.05 | 1016  | 1.00      | 0.94 | 1.06 | 1197      | 1.08 | 1.02 | 1.15      | 341  | 1.15                                       | 1.03      | 1.28 | 1.08 (1.02-1.13) | 0.006  |
| Bladder (C67)                                          | 2085                                  | 735   | 1.00 | 0.93      | 1.08 | 558   | 1.08      | 0.99 | 1.17 | 621       | 1.08 | 0.99 | 1.17      | 171  | 1.09                                       | 0.93      | 1.26 | 1.04 (0.97-1.12) | 0.233  |
| Lung (C34)                                             | 15780                                 | 4982  | 1.00 | 0.97      | 1.03 | 3956  | 1.02      | 0.99 | 1.05 | 5183      | 1.05 | 1.02 | 1.08      | 1659 | 1.09                                       | 1.03      | 1.14 | 1.04 (1.02-1.07) | 0.001  |
| Brain (C71)                                            | 1965                                  | 722   | 1.00 | 0.93      | 1.08 | 533   | 1.05      | 0.96 | 1.14 | 559       | 1.02 | 0.94 | 1.11      | 151  | 1.04                                       | 0.89      | 1.23 | 1.01 (0.94-1.09) | 0.701  |
| Malignant melanoma (C43)                               | 6316                                  | 2280  | 1.00 | 0.96      | 1.04 | 1759  | 1.08      | 1.03 | 1.13 | 1810      | 1.03 | 0.98 | 1.08      | 467  | 1.01                                       | 0.92      | 1.11 | 1.00 (0.96-1.05) | 0.838  |
| Cervix (C53) <sup>§</sup>                              | 662                                   | 241   | 1.00 | 0.88      | 1.14 | 182   | 1.07      | 0.92 | 1.23 | 184       | 0.97 | 0.84 | 1.12      | 55   | 1.04                                       | 0.79      | 1.36 | 0.99 (0.87-1.13) | 0.907  |
| Endometrium (C54) <sup>§</sup>                         | 8066                                  | 3327  | 1.00 | 0.97      | 1.04 | 2075  | 0.96      | 0.92 | 1.00 | 2071      | 0.94 | 0.90 | 0.98      | 593  | 1.03                                       | 0.95      | 1.11 | 0.99 (0.95-1.03) | 0.562  |
| Ovary (C56) <sup>¶</sup>                               | 6361                                  | 2473  | 1.00 | 0.96      | 1.04 | 1612  | 0.93      | 0.89 | 0.98 | 1779      | 0.95 | 0.91 | 1.00      | 497  | 1.00                                       | 0.91      | 1.09 | 0.99 (0.95-1.03) | 0.587  |
| Leukaemia (C91-C93, C95)                               | 2909                                  | 1116  | 1.00 | 0.94      | 1.06 | 762   | 0.99      | 0.92 | 1.06 | 825       | 1.00 | 0.93 | 1.07      | 206  | 0.95                                       | 0.83      | 1.09 | 0.99 (0.93-1.05) | 0.663  |
| Non-Hodgkins lymphoma (C82-C85)                        | 5608                                  | 2250  | 1.00 | 0.96      | 1.04 | 1482  | 0.95      | 0.90 | 1.00 | 1512      | 0.90 | 0.85 | 0.94      | 364  | 0.82                                       | 0.74      | 0.91 | 0.91 (0.86-0.95) | <0.001 |
| Stomach (C16)                                          | 1714                                  | 693   | 1.00 | 0.93      | 1.08 | 449   | 0.93      | 0.85 | 1.02 | 463       | 0.89 | 0.81 | 0.97      | 109  | 0.81                                       | 0.67      | 0.98 | 0.90 (0.83-0.98) | 0.014  |
| Multiple myeloma (C90)                                 | 2356                                  | 986   | 1.00 | 0.94      | 1.07 | 596   | 0.88      | 0.81 | 0.95 | 627       | 0.88 | 0.81 | 0.95      | 147  | 0.80                                       | 0.68      | 0.94 | 0.90 (0.84-0.97) | 0.004  |
| Renal cell carcinoma (C64)                             | 2855                                  | 1163  | 1.00 | 0.94      | 1.06 | 759   | 0.94      | 0.88 | 1.01 | 754       | 0.87 | 0.81 | 0.94      | 179  | 0.78                                       | 0.67      | 0.90 | 0.88 (0.83-0.94) | <0.001 |
| Oesophageal adenocarcinoma (C15) <sup>†</sup>          | 759                                   | 335   | 1.00 | 0.90      | 1.12 | 189   | 0.82      | 0.71 | 0.94 | 180       | 0.71 | 0.61 | 0.82      | 55   | 0.80                                       | 0.61      | 1.05 | 0.83 (0.73-0.94) | 0.004  |
| Thyroid (C73)                                          | 883                                   | 383   | 1.00 | 0.90      | 1.11 | 233   | 0.86      | 0.76 | 0.98 | 216       | 0.74 | 0.65 | 0.85      | 51   | 0.65                                       | 0.49      | 0.86 | 0.79 (0.70-0.89) | <0.001 |

\*Adjusted for region, body mass index, deprivation index, educational attainment, smoking, strenuous exercise, use of oral contraceptives and menopausal hormones and stratified by year of birth and year completed recruitment questionnaire. For estimation of trends, intake categories 1-2, 3-6, 7-14, 15+ drinks/week, were scored according to the mean alcohol intake at reassessment 7.8 years later in each baseline group (2.6, 5.5, 10.0, 17.0 drinks/week respectively).

<sup>†</sup> See methods for histological classification.

<sup>††</sup> Additional adjustment for age at menarche, age at first birth, parity and family history of breast cancer.

<sup>§</sup> Additional adjustment for age at menarche, age at first birth and parity. Includes only women who answered no to hysterectomy at recruitment.

<sup>¶</sup> Additional adjustment for age at menarche, age at first birth and parity. Includes only women who answered no to bilateral oophorectomy at recruitment.

**eTable2: Frequency troubled by reflux/heartburn in relation to alcohol intake reported by 485,870 participants in median year 2006**

---

|                                              | Frequency troubled by reflux/heartburn |                   |                   |                   |
|----------------------------------------------|----------------------------------------|-------------------|-------------------|-------------------|
|                                              | rarely/never                           | < once week       | about once week   | > once week       |
| Drinks/week, mean (SD) (n)                   | 5.4 (6.3) (299702)                     | 5.2 (6.1) (79215) | 5.0 (6.1) (42432) | 4.5 (6.0) (64521) |
| Reduced alcohol intake due to illness, % (n) | 4.7 (13926)                            | 6.0 (4715)        | 7.9 (3344)        | 10.3 (6638)       |

---

**eTable 3: Relative risks by cancer site for alcohol intake categories in drinks/week and per 1 drink/day of alcohol, excluding the first five years of follow-up**

| Cancer site                                            | Alcohol consumption (drinks per week) |       |      |           |      |      |           |      |      |           |      |      |           |      | RR* 95%CI<br>per 1 drink/day<br>of alcohol | p (trend) |      |                  |        |
|--------------------------------------------------------|---------------------------------------|-------|------|-----------|------|------|-----------|------|------|-----------|------|------|-----------|------|--------------------------------------------|-----------|------|------------------|--------|
|                                                        | 1-2                                   |       |      |           | 3-6  |      |           |      | 7-14 |           |      |      | 15+       |      |                                            |           |      |                  |        |
|                                                        | N                                     | n     | RR*  | 95% g-sCI | n    | RR*  | 95% g-sCI | n    | RR*  | 95% g-sCI | n    | RR*  | 95% g-sCI | n    |                                            |           | RR*  | 95% g-sCI        |        |
| Oesophageal squamous cell carcinoma (C15) <sup>†</sup> | 915                                   | 266   | 1.00 | 0.88      | 1.13 | 213  | 1.10      | 0.96 | 1.26 | 306       | 1.36 | 1.21 | 1.52      | 130  | 2.04                                       | 1.71      | 2.44 | 1.41 (1.27-1.56) | <0.001 |
| Oral cavity & pharynx (C00-C14)                        | 1595                                  | 463   | 1.00 | 0.91      | 1.10 | 370  | 1.08      | 0.98 | 1.20 | 518       | 1.29 | 1.18 | 1.41      | 244  | 2.04                                       | 1.80      | 2.33 | 1.40 (1.30-1.51) | <0.001 |
| Larynx (C32)                                           | 230                                   | 57    | 1.00 | 0.77      | 1.30 | 55   | 1.19      | 0.91 | 1.55 | 86        | 1.47 | 1.19 | 1.81      | 32   | 1.76                                       | 1.23      | 2.52 | 1.33 (1.09-1.62) | 0.005  |
| Breast (C50) <sup>††</sup>                             | 34053                                 | 11895 | 1.00 | 0.98      | 1.02 | 8803 | 1.05      | 1.03 | 1.07 | 10272     | 1.13 | 1.11 | 1.15      | 3083 | 1.27                                       | 1.23      | 1.32 | 1.12 (1.10-1.14) | <0.001 |
| Colorectum (C18-C20)                                   | 13891                                 | 4976  | 1.00 | 0.97      | 1.03 | 3595 | 1.04      | 1.01 | 1.08 | 4085      | 1.10 | 1.06 | 1.13      | 1235 | 1.26                                       | 1.19      | 1.33 | 1.11 (1.08-1.14) | <0.001 |
| Liver (C22)                                            | 1121                                  | 414   | 1.00 | 0.91      | 1.10 | 294  | 1.05      | 0.93 | 1.17 | 319       | 1.06 | 0.95 | 1.19      | 94   | 1.19                                       | 0.97      | 1.46 | 1.08 (0.97-1.19) | 0.148  |
| Pancreas (C25)                                         | 3521                                  | 1282  | 1.00 | 0.95      | 1.06 | 901  | 1.02      | 0.95 | 1.09 | 1037      | 1.08 | 1.01 | 1.15      | 301  | 1.17                                       | 1.04      | 1.31 | 1.08 (1.02-1.14) | 0.007  |
| Bladder (C67)                                          | 1745                                  | 612   | 1.00 | 0.92      | 1.08 | 463  | 1.07      | 0.98 | 1.17 | 527       | 1.09 | 1.00 | 1.19      | 143  | 1.09                                       | 0.92      | 1.28 | 1.05 (0.97-1.14) | 0.216  |
| Lung (C34)                                             | 13698                                 | 4330  | 1.00 | 0.97      | 1.03 | 3452 | 1.02      | 0.99 | 1.06 | 4481      | 1.05 | 1.02 | 1.08      | 1435 | 1.09                                       | 1.04      | 1.15 | 1.04 (1.02-1.07) | 0.002  |
| Brain (C71)                                            | 1582                                  | 590   | 1.00 | 0.92      | 1.09 | 417  | 1.00      | 0.91 | 1.10 | 455       | 1.01 | 0.92 | 1.10      | 120  | 1.01                                       | 0.84      | 1.21 | 1.00 (0.92-1.09) | 0.915  |
| Malignant melanoma (C43)                               | 5126                                  | 1837  | 1.00 | 0.95      | 1.05 | 1437 | 1.10      | 1.04 | 1.16 | 1489      | 1.06 | 1.00 | 1.11      | 363  | 0.99                                       | 0.89      | 1.10 | 1.01 (0.96-1.06) | 0.771  |
| Cervix (C53) <sup>§</sup>                              | 465                                   | 170   | 1.00 | 0.86      | 1.17 | 127  | 1.06      | 0.90 | 1.27 | 132       | 1.00 | 0.84 | 1.19      | 36   | 1.01                                       | 0.72      | 1.40 | 1.00 (0.85-1.16) | 0.950  |
| Endometrium (C54) <sup>§</sup>                         | 6432                                  | 2656  | 1.00 | 0.96      | 1.04 | 1651 | 0.96      | 0.91 | 1.00 | 1658      | 0.95 | 0.90 | 0.99      | 467  | 1.02                                       | 0.93      | 1.11 | 0.99 (0.95-1.03) | 0.580  |
| Ovary (C56) <sup>¶</sup>                               | 4775                                  | 1851  | 1.00 | 0.95      | 1.05 | 1233 | 0.95      | 0.90 | 1.01 | 1319      | 0.94 | 0.89 | 1.00      | 372  | 1.01                                       | 0.91      | 1.12 | 0.99 (0.94-1.03) | 0.558  |
| Leukaemia (C91-C93, C95)                               | 2468                                  | 958   | 1.00 | 0.94      | 1.07 | 640  | 0.97      | 0.89 | 1.04 | 701       | 0.99 | 0.92 | 1.07      | 169  | 0.92                                       | 0.79      | 1.08 | 0.98 (0.91-1.05) | 0.513  |
| Non-Hodgkins lymphoma (C82-C85)                        | 4666                                  | 1843  | 1.00 | 0.95      | 1.05 | 1234 | 0.96      | 0.91 | 1.02 | 1289      | 0.94 | 0.89 | 0.99      | 300  | 0.83                                       | 0.74      | 0.93 | 0.93 (0.88-0.97) | 0.003  |
| Stomach (C16)                                          | 1394                                  | 564   | 1.00 | 0.92      | 1.09 | 371  | 0.95      | 0.86 | 1.05 | 375       | 0.90 | 0.81 | 0.99      | 84   | 0.79                                       | 0.63      | 0.98 | 0.89 (0.81-0.98) | 0.020  |
| Multiple myeloma (C90)                                 | 2030                                  | 866   | 1.00 | 0.93      | 1.07 | 511  | 0.86      | 0.79 | 0.94 | 527       | 0.85 | 0.78 | 0.92      | 126  | 0.79                                       | 0.66      | 0.94 | 0.88 (0.81-0.95) | 0.001  |
| Renal cell carcinoma (C64)                             | 2412                                  | 991   | 1.00 | 0.94      | 1.07 | 651  | 0.95      | 0.88 | 1.03 | 617       | 0.84 | 0.77 | 0.91      | 153  | 0.79                                       | 0.67      | 0.92 | 0.87 (0.81-0.93) | <0.001 |
| Oesophageal adenocarcinoma (C15) <sup>†</sup>          | 678                                   | 302   | 1.00 | 0.89      | 1.12 | 162  | 0.78      | 0.67 | 0.91 | 164       | 0.72 | 0.62 | 0.84      | 50   | 0.82                                       | 0.62      | 1.08 | 0.84 (0.74-0.97) | 0.013  |
| Thyroid (C73)                                          | 714                                   | 308   | 1.00 | 0.89      | 1.12 | 186  | 0.86      | 0.74 | 0.99 | 178       | 0.76 | 0.65 | 0.88      | 42   | 0.67                                       | 0.49      | 0.90 | 0.80 (0.70-0.92) | 0.001  |

\*Adjusted for region, body mass index, deprivation index, educational attainment, smoking, strenuous exercise, use of oral contraceptives and menopausal hormones and stratified by year of birth and year completed recruitment questionnaire. For estimation of trends, intake categories 1-2, 3-6, 7-14, 15+ drinks/week, were scored according to the mean alcohol intake at reassessment 7.8 years later in each baseline group (2.6, 5.5, 10.0, 17.0 drinks/week respectively).

<sup>†</sup> See methods for histological classification.

<sup>††</sup> Additional adjustment for age at menarche, age at first birth, parity and family history of breast cancer.

<sup>§</sup> Additional adjustment for age at menarche, age at first birth and parity. Includes only women who answered no to hysterectomy at recruitment.

<sup>¶</sup> Additional adjustment for age at menarche, age at first birth and parity. Includes only women who answered no to bilateral oophorectomy at recruitment.

**eTable4: RRs underlying Figure 3**

| Alcohol consumption<br>(drinks per week) | Smoking at recruitment |      |           |             |        |           |                            |       |           |                            |        |            |
|------------------------------------------|------------------------|------|-----------|-------------|--------|-----------|----------------------------|-------|-----------|----------------------------|--------|------------|
|                                          | Never                  |      |           | Past        |        |           | Current <10 cigarettes/day |       |           | Current 10+ cigarettes/day |        |            |
|                                          | Cases/women            | RR*  | 95% g-sCI | Cases/women | RR*    | 95% g-sCI | Cases/women                | RR*   | 95% g-sCI | Cases/women                | RR*    | 95% g-sCI  |
| 1-2                                      | 447/166925             | 1.00 | 0.91 1.10 | 260/77807   | 1.32   | 1.17 1.49 | 46/13653                   | 1.27  | 0.95 1.70 | 210/32901                  | 2.62   | 2.29 3.01  |
| 3-6                                      | 274/107071             | 0.97 | 0.86 1.10 | 194/63291   | 1.21   | 1.05 1.39 | 53/11045                   | 1.87  | 1.43 2.44 | 262/27085                  | 3.96   | 3.50 4.48  |
| 7-14                                     | 269/96062              | 1.07 | 0.95 1.21 | 290/82490   | 1.39   | 1.23 1.56 | 78/13390                   | 2.30  | 1.84 2.87 | 474/37696                  | 5.24   | 4.78 5.75  |
| 15+                                      | 68/20475               | 1.33 | 1.05 1.69 | 129/25774   | 2.06   | 1.73 2.45 | 18/3373                    | 2.21  | 1.39 3.51 | 285/12726                  | 9.70   | 8.63 10.91 |
| p <sup>(trend)</sup>                     |                        | 0.03 |           |             | <0.001 |           |                            | 0.005 |           |                            | <0.001 |            |

\* Adjusted for region, body mass index, deprivation index, educational attainment, strenuous exercise, use of oral contraceptives and menopausal hormones and stratified by year of birth and year completed recruitment questionnaire.

**eTable5: Alcohol-BMI interaction analyses restricted to never MHT users**

|                                | Number of cases<br>(<25,25-,≥30) | BMI (kg/m <sup>2</sup> )                                          |                                                                     |                                                                   | LR $\chi^2$ test | p(interaction) |
|--------------------------------|----------------------------------|-------------------------------------------------------------------|---------------------------------------------------------------------|-------------------------------------------------------------------|------------------|----------------|
|                                |                                  | Relative risk*<br>(95%CI) per<br>1 drink/day<br>of alcohol<br><25 | Relative risk*<br>(95%CI) per<br>1 drink/day<br>of alcohol<br>25-29 | Relative risk*<br>(95%CI) per<br>1 drink/day<br>of alcohol<br>≥30 |                  |                |
| Breast (C50) <sup>††</sup>     | 8137/6886/3406                   | 1.14 (1.10-1.18)                                                  | 1.11 (1.07-1.16)                                                    | 1.13 (1.07-1.19)                                                  | 0.54             | 0.764          |
| Cervix (C53) <sup>§</sup>      | 175/129/67                       | 0.93 (0.72-1.19)                                                  | 1.06 (0.80-1.41)                                                    | 0.90 (0.59-1.39)                                                  | 0.61             | 0.737          |
| Endometrium (C54) <sup>§</sup> | 1147/1504/1597                   | 0.97 (0.88-1.07)                                                  | 1.00 (0.92-1.09)                                                    | 0.97 (0.88-1.05)                                                  | 0.40             | 0.819          |
| Ovary (C56) <sup>¶</sup>       | 1348/1088/461                    | 0.88 (0.80-0.96)                                                  | 1.03 (0.93-1.14)                                                    | 0.88 (0.74-1.04)                                                  | 5.65             | 0.059          |

\* Relative risk and 95% confidence intervals (CI) per 1 drink/day increase in alcohol intake, adjusted by region, deprivation index, educational attainment, smoking, strenuous exercise and use of oral contraceptives and stratified by year of birth and year completed recruitment questionnaire. For estimation of trends, intake categories 1-2, 3-6, 7-14, 15+ drinks/week, were scored according to the mean alcohol intake at reassessment 7.8 years later (2.6, 5.5, 10.0, 17.0 drinks/week respectively).

<sup>††</sup> Additional adjustment for age at menarche, age at first birth, parity and family history of breast cancer.

<sup>§</sup> Additional adjustment for age at menarche, age at first birth and parity. Includes only women who answered no to hysterectomy at recruitment.

<sup>¶</sup> Additional adjustment for age at menarche, age at first birth and parity. Includes only women who answered no to bilateral oophorectomy at recruitment.

**eTable6: Alcohol-MHT interaction analyses restricted to women of normal BMI (20-24.9 kg/m<sup>2</sup>)**

|                                | Number of cases<br>(never/past/current) | HRT use                                                             |                                                                    |                                                                       | LR $\chi^2$ test | p(interaction) |
|--------------------------------|-----------------------------------------|---------------------------------------------------------------------|--------------------------------------------------------------------|-----------------------------------------------------------------------|------------------|----------------|
|                                |                                         | Relative risk*<br>(95%CI) per<br>1 drink/day<br>of alcohol<br>Never | Relative risk*<br>(95%CI) per<br>1 drink/day<br>of alcohol<br>Past | Relative risk*<br>(95%CI) per<br>1 drink/day<br>of alcohol<br>Current |                  |                |
| Breast (C50) <sup>††</sup>     | 7660/2720/8898                          | 1.13 (1.09-1.17)                                                    | 1.11 (1.04-1.18)                                                   | 1.11 (1.08-1.15)                                                      | 0.59             | 0.744          |
| Cervix (C53) <sup>§</sup>      | 164/44/77                               | 0.98 (0.75-1.26)                                                    | 0.84 (0.51-1.40)                                                   | 1.19 (0.84-1.68)                                                      | 1.43             | 0.488          |
| Endometrium (C54) <sup>§</sup> | 1091/349/876                            | 1.01 (0.92-1.12)                                                    | 0.90 (0.75-1.07)                                                   | 0.92 (0.82-1.03)                                                      | 2.36             | 0.307          |
| Ovary (C56) <sup>¶</sup>       | 1250/402/1121                           | 0.89 (0.81-0.98)                                                    | 0.99 (0.84-1.17)                                                   | 1.03 (0.93-1.13)                                                      | 4.38             | 0.112          |

\* Relative risk and 95% confidence intervals (CI) per 1 drink/day increase in alcohol intake, adjusted by region, deprivation index, educational attainment, smoking, strenuous exercise and use of oral contraceptives and stratified by year of birth and year completed recruitment questionnaire. For estimation of trends, intake categories 1-2, 3-6, 7-14, 15+ drinks/week, were scored according to the mean alcohol intake at reassessment 7.8 years later (2.6, 5.5, 10.0, 17.0 drinks/week respectively).

<sup>††</sup> Additional adjustment for age at menarche, age at first birth, parity and family history of breast cancer.

<sup>§</sup> Additional adjustment for age at menarche, age at first birth and parity. Includes only women who answered no to hysterectomy at recruitment.

<sup>¶</sup> Additional adjustment for age at menarche, age at first birth and parity. Includes only women who answered no to bilateral oophorectomy at recruitment.
